# Supplementary material for: Identification and Antifungal Susceptibility Analysis of Stephanoascus ciferrii Complex Species Isolated From Patients With Chronic Suppurative Otitis Media
Source: Front Microbiol. 2021 Jul 21;12:680060. doi: 10.3389/fmicb.2021.680060 (PMC8334361; doi:10.3389/fmicb.2021.680060)
Supplement: Supplementary file 3 [file Data_Sheet_3.ZIP]

Archive with 33 entries (32 files):
- mass spectra of the 32 isolated S.ciferrii  complex strains/
- mass spectra of the 32 isolated S.ciferrii  complex strains/S-1.emf
- mass spectra of the 32 isolated S.ciferrii  complex strains/S-10.emf
- mass spectra of the 32 isolated S.ciferrii  complex strains/S-11.emf
- mass spectra of the 32 isolated S.ciferrii  complex strains/S-12.emf
- mass spectra of the 32 isolated S.ciferrii  complex strains/S-13.emf
- mass spectra of the 32 isolated S.ciferrii  complex strains/S-14.emf
- mass spectra of the 32 isolated S.ciferrii  complex strains/S-15.emf
- mass spectra of the 32 isolated S.ciferrii  complex strains/S-16.emf
- mass spectra of the 32 isolated S.ciferrii  complex strains/S-17.emf
- mass spectra of the 32 isolated S.ciferrii  complex strains/S-18.emf
- mass spectra of the 32 isolated S.ciferrii  complex strains/S-19.emf
- mass spectra of the 32 isolated S.ciferrii  complex strains/S-2.emf
- mass spectra of the 32 isolated S.ciferrii  complex strains/S-20.emf
- mass spectra of the 32 isolated S.ciferrii  complex strains/S-21.emf
- mass spectra of the 32 isolated S.ciferrii  complex strains/S-22.emf
- mass spectra of the 32 isolated S.ciferrii  complex strains/S-23.emf
- mass spectra of the 32 isolated S.ciferrii  complex strains/S-24.emf
- mass spectra of the 32 isolated S.ciferrii  complex strains/S-25.emf
- mass spectra of the 32 isolated S.ciferrii  complex strains/S-26.emf
- mass spectra of the 32 isolated S.ciferrii  complex strains/S-27.emf
- mass spectra of the 32 isolated S.ciferrii  complex strains/S-28.emf
- mass spectra of the 32 isolated S.ciferrii  complex strains/S-29.emf
- mass spectra of the 32 isolated S.ciferrii  complex strains/S-3.emf
- mass spectra of the 32 isolated S.ciferrii  complex strains/S-30.emf
- mass spectra of the 32 isolated S.ciferrii  complex strains/S-31.emf
- mass spectra of the 32 isolated S.ciferrii  complex strains/S-32.emf
- mass spectra of the 32 isolated S.ciferrii  complex strains/S-4.emf
- mass spectra of the 32 isolated S.ciferrii  complex strains/S-5.emf
- mass spectra of the 32 isolated S.ciferrii  complex strains/S-6.emf
- mass spectra of the 32 isolated S.ciferrii  complex strains/S-7.emf
- mass spectra of the 32 isolated S.ciferrii  complex strains/S-8.emf
- mass spectra of the 32 isolated S.ciferrii  complex strains/S-9.emf
